# Supplementary material for: Contrasting microbial assembly patterns in the woody endosphere of hybrid and non-hybrid Populus trees
Source: PeerJ. 2025 Oct 10;13:e20073. doi: 10.7717/peerj.20073 (PMC12517286; doi:10.7717/peerj.20073)
Supplement: Supplemental Information 14 — Taxa with bolded text fonts had significantly different abundances between host taxa (α = 0.001). The log fold changes in abundance are displayed (LFC). Positive LFC values indicate fungal taxa with greater abundances in P. × jackii samples, while negative values indicate greater abundances in P. deltoides. ANCOM-BC analysis was performed with default settings with the exception that the struc_zero argument was set to TRUE. This setting will perform a presence absence test for fungal taxa that are only present within a single host. The analysis excluded taxa that were only detected in a single sample. [file peerj-13-20073-s014.xlsx]

## Sheet: Table S3
Phylum	Adjusted p	LFC
Ascomycota	0.6619	-0.31
Basidiomycota	<0.0001	1.55
Class	Adjusted p	LFC
Dothideomycetes	0.3341	-0.89
Leotiomycetes	0.0105	-1.87
Eurotiomycetes	<0.0001	3.01
Sordariomycetes	<0.0001	-1.24
Agaricomycetes	<0.0001	2.58
Orbiliomycetes	<0.0001	3.99
Order	Adjusted p	LFC
Myriangiales	1	-1.14
Helotiales	<0.0001	-3.76
Pleosporales	<0.0001	-5.61
Phaeomoniellales	0.9763	1.13
Diaporthales	<0.0001	-2.56
Agaricales	<0.0001	0.45
Dothideales	1	1.19
Orbiliales	<0.0001	2.24
Chaetothyriales	<0.0001	1.68
Tubeufiales	<0.0001	-0.03
Capnodiales	<0.0001	-0.32
Family	Adjusted p	LFC
Myriangiales_fam_Incertae_sedis	1	-0.81
Helotiales_fam_Incertae_sedis	1	-0.29
Coniothyriaceae	<0.0001	-6.56
Phaeomoniellaceae	0.2155	1.77
Gnomoniaceae	<0.0001	-1.68
Tricholomataceae	<0.0001	0.69
Orbiliaceae	<0.0001	2.48
Herpotrichiellaceae	<0.0001	-0.36
Tubeufiaceae	<0.0001	0.21
Trichomeriaceae	<0.0001	1.05
Vibrisseaceae	<0.0001	-3.52
Didymellaceae	<0.0001	-3.9
Elsinoaceae	0.0479	-2.46
Lentitheciaceae	<0.0001	-1.62
Diaporthaceae	<0.0001	-1.39
Didymosphaeriaceae	1	0.61
Phaeosphaeriaceae	0.5254	-1.02
Genus	Adjusted p	LFC
Endosporium	1	0.54
Cryptocline	1	1.06
Neoconiothyrium	<0.0001	-5.28
Xenocylindrosporium	0.0005	3.12
Mycena	<0.0001	2.04
Orbilia	<0.0001	3.83
Helicoma	<0.0001	1.56
Knufia	<0.0001	2.4
Phialocephala	0.0362	-2.17
Phoma	0.0248	-2.55
Elsinoe	1	-1.11
Darksidea	<0.0001	0.04
Diaporthe	<0.0001	-0.04
Muriphaeosphaeria	1	0.72
Hazslinszkyomyces	1	-0.61
Neosetophoma	<0.0001	0.15
