# Supplementary material for: Contrasting microbial assembly patterns in the woody endosphere of hybrid and non-hybrid Populus trees
Source: PeerJ. 2025 Oct 10;13:e20073. doi: 10.7717/peerj.20073 (PMC12517286; doi:10.7717/peerj.20073)
Supplement: Supplemental Information 15 — Only ASVs with significantly different abundances between host taxa are displayed (α = 0.001). The log fold changes in abundance are displayed (LFC), with positive values indicating ASVs with greater abundances in P. × jackii samples and negative values indicating greater abundances in P. deltoides. The relative abundance of ASVs within the filtered non-rarefied data used for the analysis are also displayed. The analysis was performed with default settings with the exception that the struc_zero argument was set to TRUE. This setting will perform a presence absence test when a given ASV is only present within a single host. The analysis excluded ASVs that were only detected in a single sample. [file peerj-13-20073-s015.xlsx]

## Sheet: Table S4
ASV	LFC	Relative abundance
Ascomycota;Eurotiomycetes;Phaeomoniellales;Phaeomoniellaceae;Xenocylindrosporium;unidentified	6.5	0.21821
Ascomycota;Dothideomycetes;Pleosporales;Coniothyriaceae;Neoconiothyrium;Neoconiothyrium_hakeae	-7.64	0.15792
Ascomycota;Dothideomycetes;Myriangiales;Myriangiales_fam_Incertae_sedis;Endosporium;Endosporium_aviarium	-4.58	0.08188
Ascomycota	-5.87	0.05248
Ascomycota;Eurotiomycetes;Phaeomoniellales;Phaeomoniellaceae;Xenocylindrosporium;unidentified	4.3	0.03471
Ascomycota;Eurotiomycetes;Phaeomoniellales;Phaeomoniellaceae;Xenocylindrosporium;unidentified	-5.32	0.0335
Ascomycota;Dothideomycetes;Pleosporales;Coniothyriaceae;Neoconiothyrium;Neoconiothyrium_hakeae	1.03	0.03049
Ascomycota;Dothideomycetes;Pleosporales;Coniothyriaceae;Neoconiothyrium;Neoconiothyrium_hakeae	-4.95	0.02098
Ascomycota;Dothideomycetes;Pleosporales;Coniothyriaceae;Neoconiothyrium;Neoconiothyrium_hakeae	-6.44	0.01809
Ascomycota	3.08	0.01781
Ascomycota;Dothideomycetes;Pleosporales;Didymellaceae;Phoma;Phoma_puncteliae	-3.85	0.01712
Ascomycota	-4.46	0.01371
Ascomycota;Eurotiomycetes;Phaeomoniellales;Phaeomoniellaceae;Xenocylindrosporium;unidentified	1.78	0.01323
Ascomycota;Dothideomycetes;Myriangiales;Myriangiales_fam_Incertae_sedis;Endosporium;Endosporium_populi-tremuloides	2.37	0.01271
Ascomycota;Dothideomycetes;Pleosporales;Coniothyriaceae;Neoconiothyrium;Neoconiothyrium_hakeae	-4.71	0.01086
Ascomycota;Dothideomycetes;Myriangiales;Myriangiales_fam_Incertae_sedis;Endosporium;Endosporium_populi-tremuloides	1.88	0.01012
Ascomycota	1.56	0.0069
Ascomycota;Eurotiomycetes;Phaeomoniellales;unidentified;unidentified;unidentified	1.55	0.00536
Ascomycota;Eurotiomycetes;Phaeomoniellales;unidentified;unidentified;unidentified	-4.14	0.00504
Ascomycota	-4.18	0.00479
Ascomycota;Orbiliomycetes;Orbiliales;Orbiliaceae;Orbilia;Orbilia_aristata	2.23	0.00334
Ascomycota;Eurotiomycetes;Phaeomoniellales;unidentified;unidentified;unidentified	-3.73	0.00305
Ascomycota;Dothideomycetes;Pleosporales;Coniothyriaceae;Neoconiothyrium;Neoconiothyrium_hakeae	-3.69	0.00254
Ascomycota	-3.18	0.00253
Ascomycota;Dothideomycetes;Pleosporales	-4.9	0.00222
Ascomycota;Eurotiomycetes;Phaeomoniellales;Phaeomoniellaceae;Xenocylindrosporium;unidentified	0.98	0.00214
Fungi	0.08	0.002
Ascomycota;Eurotiomycetes;Phaeomoniellales;Phaeomoniellaceae;Xenocylindrosporium;unidentified	1.98	0.00177
Ascomycota	-3.34	0.00171
Ascomycota;Eurotiomycetes;Chaetothyriales;Trichomeriaceae;Knufia;Knufia_endospora	0.01	0.00154
Fungi	-2.81	0.00152
Ascomycota;Eurotiomycetes;Phaeomoniellales;Phaeomoniellaceae;Xenocylindrosporium;unidentified	1.1	0.00131
Ascomycota;Dothideomycetes;Pleosporales;Coniothyriaceae;Neoconiothyrium;Neoconiothyrium_hakeae	-3.3	0.00131
Ascomycota;Dothideomycetes;Myriangiales;Myriangiales_fam_Incertae_sedis;Endosporium;Endosporium_aviarium	-2.27	0.00124
Ascomycota;Eurotiomycetes;Phaeomoniellales;Phaeomoniellaceae;Xenocylindrosporium;unidentified	-3.14	0.00118
Ascomycota;Dothideomycetes;Myriangiales;Myriangiales_fam_Incertae_sedis;Endosporium;Endosporium_populi-tremuloides	1.51	0.00113
Ascomycota;Eurotiomycetes;Chaetothyriales;unidentified;unidentified;unidentified	0.95	0.00111
Ascomycota;Eurotiomycetes;Phaeomoniellales;unidentified;unidentified;unidentified	-2.9	0.00103
Fungi	0.44	0.00095
Ascomycota	0.16	0.00093
Ascomycota;Dothideomycetes;Myriangiales;unidentified;unidentified;unidentified	0.14	0.00088
Basidiomycota;Agaricomycetes;Agaricales;Tricholomataceae;Mycena;Mycena_juniperina	0.05	0.00088
Ascomycota;Dothideomycetes;Pleosporales;Didymosphaeriaceae	-0.01	0.00083
Ascomycota;Eurotiomycetes;Chaetothyriales;Trichomeriaceae;Knufia;Knufia_endospora	0.27	0.0008
Ascomycota;Dothideomycetes;Myriangiales;Myriangiales_fam_Incertae_sedis;Endosporium;Endosporium_populi-tremuloides	1.18	0.00079
Ascomycota;Eurotiomycetes;Phaeomoniellales;unidentified;unidentified;unidentified	0.22	0.00076
Ascomycota;Eurotiomycetes;Phaeomoniellales;Phaeomoniellaceae;Xenocylindrosporium;unidentified	0.81	0.00074
Ascomycota	0.75	0.00072
Ascomycota	0.46	0.00069
Ascomycota;Orbiliomycetes;Orbiliales;Orbiliaceae;Orbilia;Orbilia_aristata	0.3	0.00063
Fungi	-2.69	0.00051
Ascomycota;Eurotiomycetes;Phaeomoniellales;Phaeomoniellaceae;Xenocylindrosporium;unidentified	-2.55	0.0005
Ascomycota	-1.96	0.00049
Ascomycota	-1.57	0.00044
Ascomycota;Dothideomycetes;Capnodiales;unidentified;unidentified;unidentified	-0.09	0.00038
Ascomycota;Dothideomycetes;Pleosporales;Didymosphaeriaceae	0.13	0.00037
Fungi	0.03	0.00035
Fungi	0.21	0.00031
Ascomycota;Eurotiomycetes;Phaeomoniellales;Phaeomoniellaceae;Xenocylindrosporium;unidentified	-2.15	0.0003
Fungi	0.04	0.0003
Ascomycota	0.23	0.00028
Fungi	-1.59	0.00026
Ascomycota;Sordariomycetes;Diaporthales;Gnomoniaceae;unidentified;unidentified	-1.66	0.00024
Ascomycota;Dothideomycetes;Pleosporales	-0.02	0.00022
Fungi	-1.97	0.0002
Fungi	-1.66	0.00019
Ascomycota;Eurotiomycetes;Phaeomoniellales;unidentified;unidentified;unidentified	0.04	0.00018
Ascomycota;Eurotiomycetes;Phaeomoniellales;unidentified;unidentified;unidentified	0.06	0.00017
Fungi	-0.17	0.00015
Ascomycota	0.08	0.00015
Ascomycota;Eurotiomycetes;Phaeomoniellales;Phaeomoniellaceae;Xenocylindrosporium;unidentified	-0.18	0.00013
Ascomycota;Dothideomycetes;Pleosporales	-1.64	0.00013
Ascomycota;Dothideomycetes;Pleosporales;Didymellaceae;Phoma;Phoma_puncteliae	-1.39	0.00013
Ascomycota;Orbiliomycetes;Orbiliales;Orbiliaceae;Orbilia;Orbilia_aristata	-0.19	0.00012
Fungi	-0.22	0.00011
Ascomycota	-1.27	0.00011
Ascomycota;Orbiliomycetes;Orbiliales;Orbiliaceae;Orbilia;Orbilia_aristata	-0.16	0.00011
Ascomycota;Eurotiomycetes	-0.19	0.0001
Ascomycota;Eurotiomycetes;Chaetothyriales	0.05	9e-05
Fungi	0.04	9e-05
Ascomycota;Eurotiomycetes;Phaeomoniellales	-1.59	8e-05
Ascomycota;Sordariomycetes;Diaporthales;Diaporthaceae;Diaporthe;Diaporthe_citrichinensis	-1.4	7e-05
Ascomycota	-0.36	5e-05
Ascomycota;Eurotiomycetes;Phaeomoniellales;unidentified;unidentified;unidentified	-0.32	4e-05
Ascomycota;Eurotiomycetes;Chaetothyriales;Herpotrichiellaceae	-0.37	4e-05
Ascomycota;Dothideomycetes;Pleosporales;Lentitheciaceae;Darksidea;Darksidea_epsilon	-1.32	4e-05
Ascomycota;Dothideomycetes;Pleosporales;Phaeosphaeriaceae;Neosetophoma;Neosetophoma_rosigena	-1.21	4e-05
