# Supplementary material for: Contrasting microbial assembly patterns in the woody endosphere of hybrid and non-hybrid Populus trees
Source: PeerJ. 2025 Oct 10;13:e20073. doi: 10.7717/peerj.20073 (PMC12517286; doi:10.7717/peerj.20073)
Supplement: Supplemental Information 16 — Taxa with bolded text fonts had significantly different abundances between host taxa (α = 0.001). The log fold changes in abundance are displayed (LFC). Positive LFC values indicate bacterial taxa with greater abundances in P. × jackii samples, while negative values indicate greater abundances in P. deltoides. ANCOM-BC analysis was performed with default settings with the exception that the struc_zero argument was set to TRUE. This setting will perform a presence absence test for bacterial taxa that are only present within a single host. The analysis excluded taxa that were only detected in a single sample. [file peerj-13-20073-s016.xlsx]

## Sheet: Table S5
Phylum	Adjusted p	LFC
Proteobacteria	1	0.12
Actinobacteriota	1	-0.14
Firmicutes	1	-0.49
Armatimonadota	1	0.7
Bacteroidota	0.7228	-1.17
Deinococcota	1	-0.48
Acidobacteriota	<0.0001	2.14
Abditibacteriota	1	0.27
Myxococcota	1	-0.35
Gemmatimonadota	<0.0001	-1.24
Patescibacteria	0.7228	1.41
Fusobacteriota	1	0.27
Bdellovibrionota	1	0.29
Class	Adjusted p	LFC
Alphaproteobacteria	1	0.25
Actinobacteria	1	0.09
Gammaproteobacteria	1	0.55
Bacilli	1	-0.28
Thermoleophilia	1	-0.29
Fimbriimonadia	1	0.3
Bacteroidia	1	-0.96
Deinococci	1	-0.27
Acidobacteriae	<0.0001	2.35
Abditibacteria	1	0.48
Polyangia	<0.0001	-0.14
Armatimonadia	<0.0001	1.21
Myxococcia	1	0.42
Longimicrobia	<0.0001	-1.03
Saccharimonadia	0.5105	1.62
Acidimicrobiia	<0.0001	-0.75
Fusobacteriia	1	0.48
Bdellovibrionia	1	0.23
Order	Adjusted p	LFC
Sphingomonadales	1	0.08
Frankiales	1	-1.44
Rhizobiales	1	0.4
Propionibacteriales	1	-1.52
Streptomycetales	1	0.29
Burkholderiales	1	1.46
Acetobacterales	1	0.47
Lactobacillales	1	-0.89
Solirubrobacterales	1	-0.29
Kineosporiales	1	-1.27
Fimbriimonadales	1	0.41
Cytophagales	1	-0.49
Deinococcales	1	-0.16
Acidobacteriales	<0.0001	2.46
Enterobacterales	1	-0.4
Caulobacterales	0.0656	2.52
Chitinophagales	<0.0001	-1.95
Abditibacteriales	1	0.59
Micrococcales	1	-0.56
Polyangiales	<0.0001	-0.03
Corynebacteriales	1	0.13
Pseudonocardiales	1	0.14
Armatimonadales	<0.0001	1.32
Actinomycetales	1	-0.47
Myxococcales	1	0.54
Pseudomonadales	1	0.88
Sphingobacteriales	1	-0.73
Micavibrionales	1	0.59
Micromonosporales	0.0341	3.35
Longimicrobiales	<0.0001	-0.91
Saccharimonadales	0.8055	1.73
Flavobacteriales	<0.0001	-0.82
Microtrichales	<0.0001	-0.64
Fusobacteriales	1	0.59
Bacillales	1	0.56
Xanthomonadales	1	0.45
Bdellovibrionales	1	0.35
Streptosporangiales	<0.0001	-0.29
Pasteurellales	1	0.8
Rhodobacterales	1	-0.26
Family	Adjusted p	LFC
Sphingomonadaceae	1	0.12
D05-2	<0.0001	-0.18
Nocardioidaceae	1	-1.51
Streptomycetaceae	1	0.33
Oxalobacteraceae	1	1.65
Acetobacteraceae	1	0.51
Beijerinckiaceae	0.1367	1.56
Rhizobiaceae	<0.0001	-3.56
Frankiaceae	0.003	2.44
Solirubrobacteraceae	1	-0.2
Kineosporiaceae	1	-1.23
Fimbriimonadaceae	1	0.45
Nakamurellaceae	<0.0001	-0.41
Spirosomaceae	1	-1.86
Xanthobacteraceae	1	0.89
Acidobacteriaceae_(Subgroup_1)	<0.0001	2.5
Comamonadaceae	1	0.18
Caulobacteraceae	0.0989	2.56
Geodermatophilaceae	1	-1.94
Chitinophagaceae	<0.0001	-1.91
Burkholderiaceae	0.835	2.64
Abditibacteriaceae	1	0.63
Hymenobacteraceae	1	0.18
Microbacteriaceae	1	-0.22
Polyangiaceae	<0.0001	0
Corynebacteriaceae	1	-0.12
Pseudonocardiaceae	1	0.17
Armatimonadales	<0.0001	1.36
Actinomycetaceae	1	-0.43
Devosiaceae	1	-1.58
Deinococcaceae	1	0.28
Myxococcaceae	1	0.57
Erwiniaceae	1	0.27
Promicromonosporaceae	<0.0001	-0.83
Sanguibacteraceae	<0.0001	-0.1
Moraxellaceae	1	0.44
Sphingobacteriaceae	1	-0.69
Enterobacteriaceae	<0.0001	1.37
Micavibrionaceae	<0.0001	1.23
Micromonosporaceae	0.0615	3.39
Longimicrobiaceae	<0.0001	-0.88
Saccharimonadaceae	1	0.89
Weeksellaceae	<0.0001	-0.74
Streptococcaceae	1	-0.14
Pseudomonadaceae	1	1.02
Propionibacteriaceae	1	0.57
Leptotrichiaceae	1	0.96
Dermacoccaceae	1	0.5
Ilumatobacteraceae	<0.0001	-0.16
Saccharimonadales	<0.0001	1.44
Bacillaceae	1	0.6
Micrococcaceae	1	0.24
Aerococcaceae	<0.0001	0.17
Xanthomonadaceae	1	0.49
Bdellovibrionaceae	1	0.38
Streptosporangiales_Incertae_Sedis	<0.0001	-0.25
Pasteurellaceae	1	0.83
Rhodobacteraceae	1	-0.22
Neisseriaceae	1	0.47
Fusobacteriaceae	1	0.47
Genus	Adjusted p	LFC
Sphingobium	1	1.3
NoMatch	1	1.89
D05-2	<0.0001	-0.21
Sphingomonas	1	0.11
Massilia	1	1.11
Roseomonas	0.0063	-2.19
Nocardioides	0.2764	-2.38
1174-901-12	<0.0001	3.94
Aureimonas	<0.0001	-2.42
Jatrophihabitans	0.0049	2.4
Quadrisphaera	1	-0.27
Nakamurella	<0.0001	-0.44
Spirosoma	1	-1.8
Modestobacter	1	-2.25
Acetobacteraceae	<0.0001	-0.18
Abditibacterium	1	0.59
Hymenobacter	1	0.15
Amnibacterium	1	0.09
Clavibacter	<0.0001	-0.47
Methylobacterium-Methylorubrum	1	-0.06
Patulibacter	<0.0001	-0.13
Pajaroellobacter	<0.0001	-0.03
Corynebacterium	1	-0.43
Actinomycetospora	1	0.18
Armatimonadales	<0.0001	1.33
uncultured	<0.0001	0
Kineosporia	1	0.59
Marmoricola	1	0.41
Actinomyces	1	-0.46
Devosia	1	-1.62
Deinococcus	1	0.24
P3OB-42	1	0.54
Dyadobacter	<0.0001	-0.52
Erwinia	1	0.96
Sanguibacter	<0.0001	-0.13
Cellulosimicrobium	<0.0001	-0.57
Acinetobacter	1	0.3
Mucilaginibacter	1	-0.2
Allorhizobium-Neorhizobium-Pararhizobium-Rhizobium	<0.0001	-1.4
Psychroglaciecola	1	0.31
Klenkia	0.0388	-2.5
Pedobacter	<0.0001	-0.46
Actinoplanes	0.6486	2.91
Corticibacterium	<0.0001	-1.28
Saccharimonadaceae	1	0.78
Chryseobacterium	<0.0001	-0.77
Streptococcus	1	-0.18
Pseudomonas	1	0.98
Pseudonocardia	1	0.48
Leptotrichia	1	0.92
Methylocella	<0.0001	1.76
Acidiphilium	1	1.07
TM7x	1	0.29
Lawsonella	<0.0001	1.06
Saccharimonadales	<0.0001	1.41
Brevundimonas	1	1.32
Kineococcus	<0.0001	-3.08
Conexibacter	1	0.45
Abiotrophia	<0.0001	0.14
Frondihabitans	1	0.65
Friedmanniella	0.3466	1.08
Micrococcus	1	0.62
Xanthomonas	1	0.46
Frigoribacterium	<0.0001	-2.37
Bdellovibrio	1	0.35
Motilibacter	<0.0001	-0.29
Enhydrobacter	1	0.44
Haemophilus	<0.0001	0.14
Rubellimicrobium	1	-0.52
Curtobacterium	1	0.25
Aggregatibacter	<0.0001	1.19
Rathayibacter	<0.0001	-0.39
Edaphobaculum	<0.0001	-0.22
Neisseria	1	0.43
Bacillus	1	0.26
Fusobacterium	1	0.44
Tardiphaga	<0.0001	-0.15
