# Supplementary material for: Contrasting microbial assembly patterns in the woody endosphere of hybrid and non-hybrid Populus trees
Source: PeerJ. 2025 Oct 10;13:e20073. doi: 10.7717/peerj.20073 (PMC12517286; doi:10.7717/peerj.20073)
Supplement: Supplemental Information 17 — Only ASVs with significantly different abundances between host taxa are displayed (α = 0.001). The log fold changes in abundance are displayed (LFC), with positive values indicating ASVs with greater abundances in P. × jackii samples and negative values indicating greater abundances in P. deltoides. The relative abundance of ASVs within the filtered non-rarefied data used for the analysis are also displayed. The analysis was performed with default settings with the exception that the struc_zero argument was set to TRUE. This setting will perform a presence absence test when a given ASV is only present within a single host. The analysis excluded ASVs that were only detected in a single sample. [file peerj-13-20073-s017.xlsx]

## Sheet: Table S6
ASV	LFC	Relative abundance
Actinobacteriota;ActinoMicromonosporales;Micromonosporaceae;Actinoplanes	4.36	0.02715
Actinobacteriota;ActinoKineosporiales;Kineosporiaceae;Quadrisphaera	-2.42	0.01983
ProteoAlphaproteoRhizobiales;Rhizobiaceae;Corticibacterium;Corticibacterium_populi	-1.21	0.01551
Actinobacteriota;ActinoKineosporiales;Kineosporiaceae	1.97	0.01479
Actinobacteriota;ActinoFrankiales;Geodermatophilaceae;Modestobacter	-3.76	0.00962
Actinobacteriota;ActinoKineosporiales;Kineosporiaceae;Kineococcus	-2.98	0.00934
Actinobacteriota;ActinoPropionibacteriales;Nocardioidaceae;Nocardioides	-2.95	0.00926
ProteoAlphaproteoRhizobiales;Beijerinckiaceae;1174-901-12;uncultured_Alphaproteobacteria	4.19	0.00923
Actinobacteriota;ActinoKineosporiales;Kineosporiaceae;Quadrisphaera;uncultured_bacterium	4.04	0.00836
Actinobacteriota;ActinoFrankiales;Geodermatophilaceae;Modestobacter	2.61	0.00785
Actinobacteriota;ActinoFrankiales;Geodermatophilaceae;Modestobacter	2.35	0.00461
ProteoAlphaproteoRhizobiales;Devosiaceae;Devosia	-0.47	0.00424
ProteoAlphaproteoCaulobacterales;Caulobacteraceae	3.09	0.00412
Actinobacteriota;ActinoMicrococcales;Promicromonosporaceae;Cellulosimicrobium	-0.49	0.00397
Actinobacteriota;ActinoKineosporiales;Kineosporiaceae	-1.68	0.00373
ProteoAlphaproteoRhizobiales;Devosiaceae;Devosia	-2.01	0.00368
Actinobacteriota;ActinoMicrococcales;Microbacteriaceae;Frigoribacterium	-2.29	0.0035
ProteoAlphaproteoSphingomonadales;Sphingomonadaceae;Sphingomonas	-1.68	0.00333
ProteoGammaproteoBurkholderiales;Burkholderiaceae	1.92	0.0031
Actinobacteriota;ActinoMicrococcales;Microbacteriaceae;Clavibacter	-0.38	0.00307
Actinobacteriota;ActinoMicrococcales;Microbacteriaceae;Amnibacterium;uncultured_bacterium	2.43	0.00289
ProteoAlphaproteoSphingomonadales;Sphingomonadaceae;Sphingomonas	2.24	0.00238
ProteoAlphaproteoRhizobiales;Beijerinckiaceae;1174-901-12;uncultured_soil	3.01	0.0023
ProteoAlphaproteoRhizobiales;Rhizobiaceae;Aureimonas	-0.65	0.00228
Actinobacteriota;ActinoPropionibacteriales;Nocardioidaceae;Nocardioides	-1.38	0.00228
ProteoGammaproteoBurkholderiales;Oxalobacteraceae;Massilia	1.6	0.0022
ProteoAlphaproteoRhizobiales;Beijerinckiaceae	3.13	0.00203
Actinobacteriota;ActinoCorynebacteriales;Corynebacteriaceae;Corynebacterium	1.47	0.00203
Actinobacteriota;ActinoPropionibacteriales;Nocardioidaceae;Marmoricola	2.07	0.00186
Gemmatimonadota;Longimicrobia;Longimicrobiales;Longimicrobiaceae	-0.39	0.00181
Actinobacteriota;ActinoPropionibacteriales;Nocardioidaceae;Marmoricola	-0.56	0.00176
Bacteroidota;Bacteroidia;Cytophagales;Hymenobacteraceae;Hymenobacter	2.25	0.00171
Bacteroidota;Bacteroidia;Cytophagales;Spirosomaceae;Spirosoma	-0.34	0.00167
ProteoAlphaproteoRhizobiales;Rhizobiaceae;Allorhizobium-Neorhizobium-Pararhizobium-Rhizobium	-0.23	0.00165
ProteoAlphaproteoRhizobiales;Beijerinckiaceae	2.16	0.00156
ProteoAlphaproteoSphingomonadales;Sphingomonadaceae;Sphingomonas	-1.84	0.00154
Actinobacteriota;ActinoPropionibacteriales;Nocardioidaceae;Nocardioides	-0.26	0.00153
Bacteroidota;Bacteroidia;Cytophagales;Spirosomaceae;Spirosoma	-0.65	0.00139
ProteoAlphaproteoRhizobiales;Beijerinckiaceae	2.15	0.00139
ProteoAlphaproteoSphingomonadales;Sphingomonadaceae;Sphingomonas	-0.49	0.00135
ProteoAlphaproteoRhizobiales;Beijerinckiaceae	2.82	0.00135
Actinobacteriota;ActinoMicrococcales;Microbacteriaceae	-0.19	0.00135
ProteoAlphaproteoSphingomonadales;Sphingomonadaceae;Sphingomonas	-0.38	0.00133
ProteoAlphaproteoSphingomonadales;Sphingomonadaceae;Sphingomonas	-0.34	0.00132
ProteoAlphaproteoSphingomonadales;Sphingomonadaceae;Sphingomonas	-1.05	0.00127
ProteoAlphaproteoRhizobiales	-0.7	0.00126
PatesciSaccharimonadia;Saccharimonadales;Saccharimonadales;Saccharimonadales	1.49	0.00125
ProteoAlphaproteoRhizobiales;Rhizobiaceae;Allorhizobium-Neorhizobium-Pararhizobium-Rhizobium	-0.33	0.00121
ProteoAlphaproteoRhizobiales;Xanthobacteraceae	1.69	0.00118
ProteoAlphaproteoAcetobacterales;Acetobacteraceae;Roseomonas	-0.87	0.00113
Bacteroidota;Bacteroidia;Cytophagales;Hymenobacteraceae;Hymenobacter	-0.89	0.00106
ProteoAlphaproteoRhizobiales;Beijerinckiaceae	2.25	0.00105
ProteoAlphaproteoRhizobiales;Beijerinckiaceae;1174-901-12	2.94	0.00105
ProteoAlphaproteoAcetobacterales;Acetobacteraceae	2.25	0.00104
Actinobacteriota;ActinoFrankiales;Nakamurellaceae;Nakamurella;uncultured_organism	-0.37	0.00104
ProteoAlphaproteoRhizobiales;Devosiaceae;Devosia	-0.3	0.00103
ProteoAlphaproteoCaulobacterales;Caulobacteraceae	-0.26	0.00102
Bacteroidota;Bacteroidia;Sphingobacteriales;Sphingobacteriaceae;Mucilaginibacter	-0.89	0.00096
ProteoAlphaproteoRhizobiales;Beijerinckiaceae;uncultured	-0.26	0.00095
ProteoAlphaproteoRhizobiales;Beijerinckiaceae	2.13	0.00094
ProteoAlphaproteoSphingomonadales;Sphingomonadaceae;Sphingomonas	-1.19	0.00092
Bacteroidota;Bacteroidia;Sphingobacteriales;Sphingobacteriaceae;Pedobacter	-0.25	0.00086
ProteoAlphaproteoSphingomonadales;Sphingomonadaceae;Sphingomonas	1.44	0.00083
ProteoAlphaproteoSphingomonadales;Sphingomonadaceae;Sphingomonas	1.44	0.0008
Actinobacteriota;ActinoFrankiales	1.43	0.00072
ProteoAlphaproteoSphingomonadales;Sphingomonadaceae;Sphingomonas	1.73	0.0007
ProteoAlphaproteoRhizobiales;Rhizobiaceae;Aureimonas	-0.62	0.00068
Bacteroidota;Bacteroidia;Cytophagales;Spirosomaceae;Spirosoma;Spirosoma_rigui	-0.36	0.00065
ProteoGammaproteoEnterobacterales;Enterobacteriaceae	1.42	0.00065
ProteoGammaproteoBurkholderiales;Oxalobacteraceae;Massilia	2.5	0.00065
Actinobacteriota;ActinoMicrococcales;Microbacteriaceae	-0.19	0.00064
Actinobacteriota;ActinoKineosporiales;Kineosporiaceae;Quadrisphaera	1.43	0.00059
ProteoAlphaproteoSphingomonadales;Sphingomonadaceae;Sphingomonas	-0.09	0.00058
ProteoAlphaproteoSphingomonadales;Sphingomonadaceae;Sphingomonas	-0.81	0.00057
ProteoAlphaproteoSphingomonadales;Sphingomonadaceae;Sphingomonas	1.37	0.00057
ProteoAlphaproteoAcetobacterales;Acetobacteraceae;Roseomonas	-0.13	0.00056
ProteoAlphaproteoSphingomonadales;Sphingomonadaceae;Sphingomonas	-0.39	0.00055
Actinobacteriota;Actinobacteria	-0.43	0.00054
ProteoAlphaproteoRhizobiales;Beijerinckiaceae	-0.57	0.00054
ProteoAlphaproteoRhizobiales;Beijerinckiaceae	1.73	0.00052
ProteoAlphaproteoRhizobiales;Rhizobiaceae;Aureimonas	-0.49	0.00052
ProteoAlphaproteoRhizobiales;Rhizobiaceae	-0.46	0.00051
ProteoAlphaproteoSphingomonadales;Sphingomonadaceae;Sphingomonas	-0.08	0.0005
ProteoAlphaproteoRhizobiales;Devosiaceae;Devosia	-0.14	0.0005
ProteoAlphaproteoSphingomonadales;Sphingomonadaceae;Sphingomonas	-0.11	0.00048
ProteoAlphaproteoRhizobiales;Rhizobiaceae;Allorhizobium-Neorhizobium-Pararhizobium-Rhizobium;Rhizobium_soli	-0.13	0.00048
ProteoAlphaproteoSphingomonadales;Sphingomonadaceae;Sphingomonas	1.62	0.00047
ProteoAlphaproteoAcetobacterales;Acetobacteraceae	1.57	0.00046
ProteoAlphaproteoRhizobiales;Beijerinckiaceae;Methylobacterium-Methylorubrum	-0.23	0.00046
Actinobacteriota;ActinoFrankiales;Frankiaceae;Jatrophihabitans;Jatrophihabitans_sp.	1.46	0.00045
Actinobacteriota;ActinoFrankiales;Frankiaceae;Jatrophihabitans	1.6	0.00045
ProteoGammaproteoBurkholderiales;Comamonadaceae	-0.13	0.00044
ProteoAlphaproteoSphingomonadales;Sphingomonadaceae;Sphingomonas	-0.3	0.00043
ProteoAlphaproteoSphingomonadales;Sphingomonadaceae;Sphingomonas	-0.22	0.00043
ProteoAlphaproteoAcetobacterales;Acetobacteraceae	1.2	0.00043
ProteoAlphaproteoSphingomonadales;Sphingomonadaceae;Sphingomonas	-0.43	0.00042
Actinobacteriota;ActinoPropionibacteriales;Nocardioidaceae;Nocardioides	-0.12	0.00042
ProteoAlphaproteoAcetobacterales;Acetobacteraceae;Roseomonas	1.25	0.00041
ProteoAlphaproteoRhizobiales;Xanthobacteraceae;Tardiphaga	-0.07	0.00041
ProteoAlphaproteoSphingomonadales;Sphingomonadaceae;Sphingomonas	-0.02	0.0004
ProteoAlphaproteoSphingomonadales;Sphingomonadaceae;Sphingomonas	-0.26	0.0004
ProteoAlphaproteoAcetobacterales;Acetobacteraceae	1.84	0.0004
ProteoAlphaproteoSphingomonadales;Sphingomonadaceae;Sphingomonas	-0.02	0.0004
ProteoGammaproteoBurkholderiales;Comamonadaceae	1.6	0.00039
ProteoAlphaproteoAcetobacterales;Acetobacteraceae;Roseomonas	-0.28	0.00039
Bacteroidota;Bacteroidia;Cytophagales;Spirosomaceae;Dyadobacter	-0.01	0.00038
Actinobacteriota;ActinoMicrococcales;Microbacteriaceae	1.51	0.00037
ProteoAlphaproteoRhizobiales;Beijerinckiaceae	1.5	0.00035
Acidobacteriota;Acidobacteriae;Acidobacteriales;Acidobacteriaceae_(Subgroup_1)	1.28	0.00035
ProteoAlphaproteoSphingomonadales;Sphingomonadaceae;Sphingomonas;bacterium_B0089	-0.1	0.00035
ProteoAlphaproteoRhizobiales;Beijerinckiaceae	1.32	0.00034
ProteoAlphaproteoRhizobiales;Beijerinckiaceae;Methylocella;uncultured_bacterium	1.83	0.00033
Actinobacteriota;ActinoMicrococcales;Sanguibacteraceae;Sanguibacter	-0.06	0.00033
ProteoAlphaproteoAcetobacterales;Acetobacteraceae;Roseomonas;Roseomonas_elaeocarpi	-0.19	0.00031
Actinobacteriota;ActinoMicrococcales;Microbacteriaceae;Amnibacterium;uncultured_bacterium	1.46	0.00031
ProteoAlphaproteoAcetobacterales;Acetobacteraceae;Acetobacteraceae;Roseomonas_sp.	-0.11	0.0003
ProteoAlphaproteoRhizobiales;Beijerinckiaceae;1174-901-12	1.21	0.0003
ProteoAlphaproteoCaulobacterales;Caulobacteraceae	1.54	0.0003
ProteoAlphaproteoRhizobiales	1.4	0.0003
Abditibacteriota;AbditiAbditibacteriales;Abditibacteriaceae;Abditibacterium	1.25	0.0003
Bacteroidota;Bacteroidia;Cytophagales;Hymenobacteraceae;Hymenobacter	1.46	0.00029
ProteoGammaproteoBurkholderiales;Comamonadaceae	-0.03	0.00028
Bacteroidota;Bacteroidia;Cytophagales;Hymenobacteraceae;Hymenobacter	-0.05	0.00027
Bacteroidota;Bacteroidia;Sphingobacteriales;Sphingobacteriaceae;Mucilaginibacter	1.34	0.00027
Actinobacteriota;ActinoStreptosporangiales;Streptosporangiales_Incertae_Sedis;Motilibacter;uncultured_bacterium	-0.21	0.00026
Actinobacteriota;ActinoMicrococcales;Microbacteriaceae;Rathayibacter	-0.31	0.00026
ProteoAlphaproteoRhizobiales;Beijerinckiaceae;1174-901-12	1.25	0.00026
ProteoAlphaproteoSphingomonadales;Sphingomonadaceae;Sphingomonas	1.21	0.00026
ProteoAlphaproteoSphingomonadales;Sphingomonadaceae;Sphingomonas	1.57	0.00025
Actinobacteriota;ActinoKineosporiales;Kineosporiaceae;Quadrisphaera	1.27	0.00025
Bacteroidota;Bacteroidia;Sphingobacteriales;Sphingobacteriaceae;Mucilaginibacter	-0.02	0.00025
Acidobacteriota;Acidobacteriae;Acidobacteriales;Acidobacteriaceae_(Subgroup_1)	1.4	0.00024
ProteoAlphaproteoRhizobiales;Rhizobiaceae;Aureimonas	-0.25	0.00024
Actinobacteriota;ActinoMicrococcales;Microbacteriaceae	-0.01	0.00024
Myxococcota;Polyangia;Polyangiales;Polyangiaceae;Pajaroellobacter;uncultured_bacterium	0.05	0.00023
Abditibacteriota;AbditiAbditibacteriales;Abditibacteriaceae;Abditibacterium	0.11	0.00021
Abditibacteriota;AbditiAbditibacteriales;Abditibacteriaceae;Abditibacterium	1.2	0.00021
ProteoAlphaproteoSphingomonadales;Sphingomonadaceae;Sphingomonas	0.11	0.00021
Bacteroidota;Bacteroidia;Sphingobacteriales;Sphingobacteriaceae;Mucilaginibacter	1.31	0.00021
ProteoGammaproteoPasteurellales;Pasteurellaceae;Aggregatibacter	1.26	0.00021
Abditibacteriota;AbditiAbditibacteriales;Abditibacteriaceae;Abditibacterium;bacterium	1.41	0.00018
ProteoAlphaproteoAcetobacterales;Acetobacteraceae	0.11	0.00016
Bacteroidota;Bacteroidia;Sphingobacteriales;Sphingobacteriaceae;Mucilaginibacter	0.09	0.00016
ProteoAlphaproteoRhizobiales;Beijerinckiaceae;1174-901-12;uncultured_bacterium	1.48	0.00016
ProteoGammaproteoBurkholderiales	1.13	0.00015
ProteoAlphaproteoRhizobiales;Rhizobiaceae;Aureimonas	-0.04	0.00014
ProteoGammaproteoBurkholderiales;Neisseriaceae;Neisseria	0.1	0.00014
ProteoAlphaproteoCaulobacterales;Caulobacteraceae	0.13	0.00012
Actinobacteriota;ActinoCorynebacteriales;Corynebacteriaceae;Lawsonella;uncultured_bacterium	1.14	0.00011
Armatimonadota;Armatimonadia;Armatimonadales;Armatimonadales;Armatimonadales;uncultured_soil	1.08	0.00011
Firmicutes;Bacilli;Lactobacillales;Streptococcaceae;Streptococcus;Streptococcus_cristatus	0.15	0.0001
Actinobacteriota;ActinoActinomycetales;Actinomycetaceae;Actinomyces	0.04	0.0001
ProteoAlphaproteoSphingomonadales;Sphingomonadaceae;Sphingomonas	1.12	0.0001
ProteoAlphaproteoAcetobacterales;Acetobacteraceae;Roseomonas	0.19	8e-05
ProteoAlphaproteoRhizobiales;Beijerinckiaceae;Methylobacterium-Methylorubrum	0.21	8e-05
Firmicutes;Bacilli;Lactobacillales;Aerococcaceae;Abiotrophia;uncultured_bacterium	0.22	7e-05
Actinobacteriota;ActinoPropionibacteriales;Nocardioidaceae;Marmoricola;uncultured_bacterium	0.99	7e-05
ProteoAlphaproteoRhizobiales;Beijerinckiaceae;uncultured	0.09	7e-05
ProteoGammaproteoPasteurellales;Pasteurellaceae;Haemophilus	0.22	7e-05
ProteoGammaproteoPseudomonadales;Pseudomonadaceae;Pseudomonas	0.24	6e-05
