# Supplementary material for: Contrasting microbial assembly patterns in the woody endosphere of hybrid and non-hybrid Populus trees
Source: PeerJ journal article supplement (doi:10.7717/peerj.20073), 2025-10-10

**A.**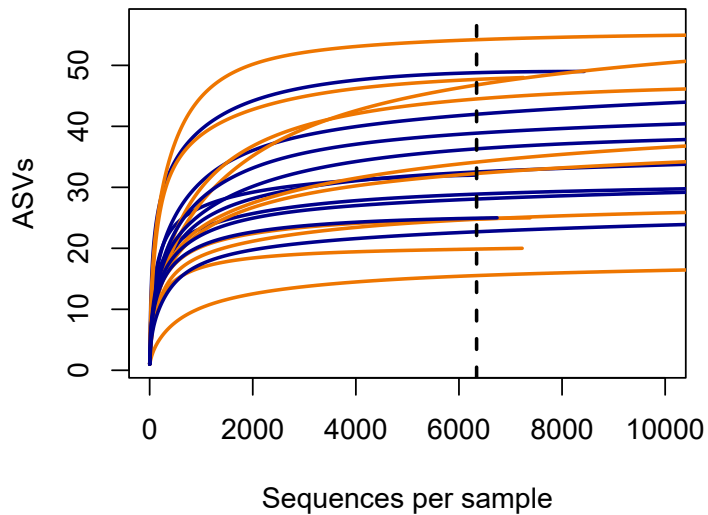**B.**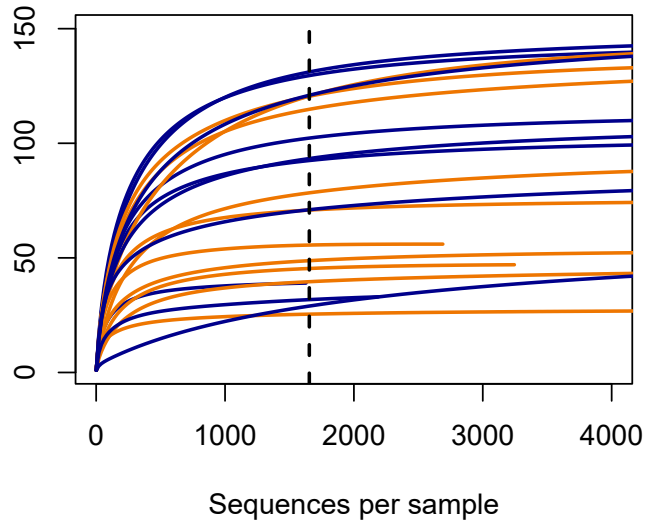

Supplement: Supporting_figure_8.pdf [file Supporting_figure_8.pdf]
